# Supplementary material for: Development of a mental health recovery module for the WHOQOL
Source: Springer Nature journal article supplement (doi:10.1007/s11136-019-02265-y), 2019-08-10
Supplement: MOESM1 [file 17056296]

**Supplementary Table S1 -** Methodological steps and criteria used for item elimination.

| **Steps** | **Methodological aim** | **Criterion description** |
| --- | --- | --- |
| **Step 1** | Skewness of each item is assessed | The item's mean is between 2.00-4.00 on the 5-point Likert scale. There are no obvious ceiling or floor effects. |
|  |  | Kurtosis scores are between -1.00 and +1.00. |
| **Step 2** | Discriminant validity of each item is assessed | Items discriminate between those with and without mental health and addiction issues. Any item with a result of *p* >0.05 (Mann Whitney U test) is red-flagged for elimination, if failing the next criteria. |
| **Step 3** | Construct validity of each item is assessed | Using the mental health data set only - item's correlation (Spearman's *rho*) above 0.30 with 1) Total QOL 2) the *g* facet 3) MH *g-*facet, and 4) MH1. |
| **Step 4** | Ensure no duplication with existing WHOQOL-BREF items | Spearman’s item correlations are below 0.60 with any existing WHOQOL item. |
| **Step 5** | Ensure no duplication with existing candidate items | Spearman’s item correlations are below 0.60 with any existing mental health candidate items. |
| **Step 6** | Rasch criteria for item inclusion assessed | Items are removed if identified as having disordered thresholds, differential item functioning in any |
|  |  | demographic characteristics (DIF), or evidence of local dependency - if item residual correlations were >0.2 above the mean of all residual correlations. The final model needs to demonstrate nonsignificant chi square and a Person Separation Index (PSI) above 0.80 when extreme persons are included, to be used for individual and group analysis. Rasch unidimensionality analysis needs to show acceptable fit to Rasch expectations. Person-item threshold distribution, with extreme persons included, needs to show an acceptable item difficulty distribution and measurement capability across the sample. |
|  | **Conceptual criteria are met throughout** | Practicality of items for redress within mental health service environments, question complexity considered, items are aligned with the WHO definitions of HRQoL and mental health. |
|  |  | Items can be used in aggregated or individual recovery planning applications. |
|  |  | Module length is kept as short as possible without losing reliability/validity for subsamples of the population. |
|  |  | Items are sensitive to change and relevant to the subjective processes involved with recovering one’s life following mental health/addiction problems. |

**Development of a Mental Health Recovery Module for the WHOQOL**

Melissa J. Rowthorn*1, D. Rex Billington1, Christian U. Krägeloh1, Jason Landon1, Oleg N. Medvedev2

1Auckland University of Technology, Auckland, New Zealand,

2University of Waikato, Hamilton, New Zealand,

*Corresponding Author:

Melissa Rowthorn

Auckland University of Technology

Psychology Department AR Building

90 Akoranga Drive

Northcote, Auckland

Phone: 64-22-123-6619

Email: [hrqolresearch@gmail.com](mailto:hrqolresearch@gmail.com)

ORCID: <https://orcid.org/0000-0002-0082-6705>
